# Supplementary material for: Using Machine Learning to Elucidate the Spatial and Genetic Complexity of the Ascending Aorta
Source: bioRxiv or medRxiv preprint supplement (doi:10.1101/2021.11.01.21265701), 2021-11-02

## Supplemental Figure 1: Quality control for GWAS

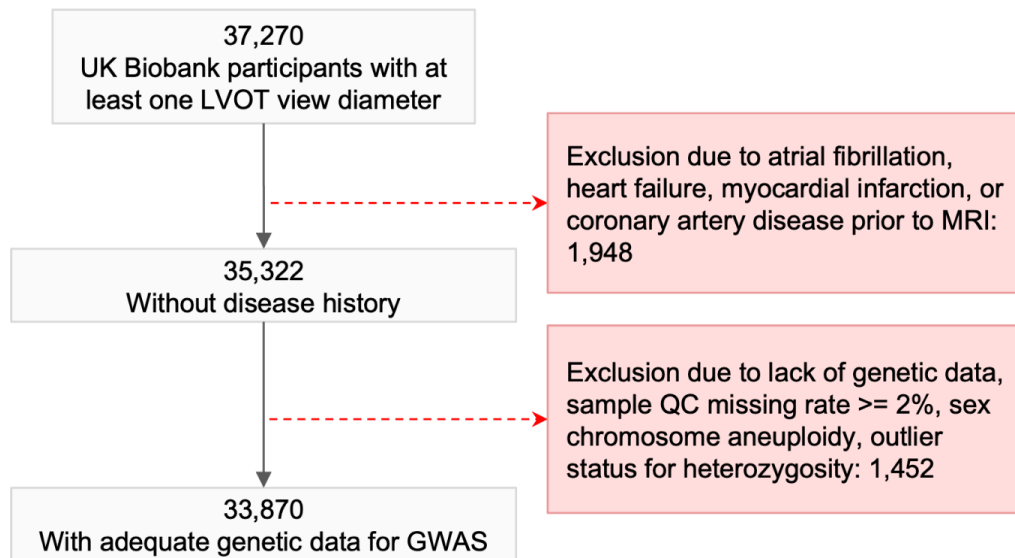

**Supplemental Figure 2:** Distributions of extracted diameters

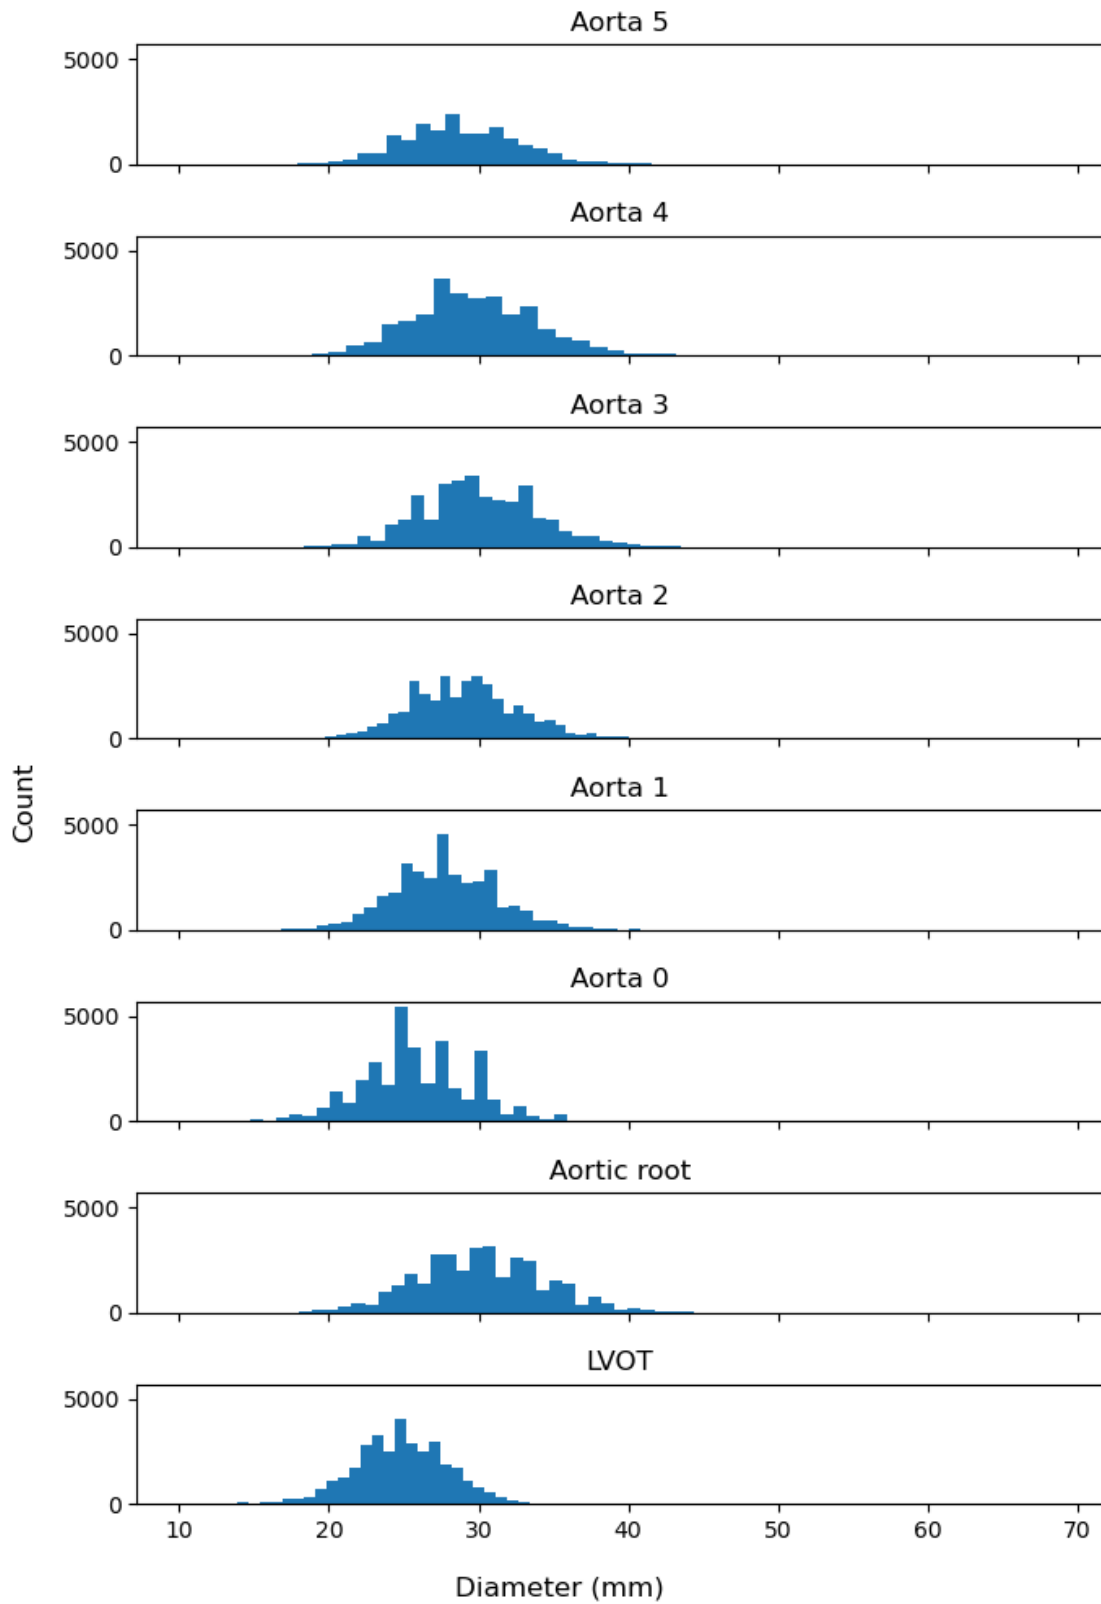

**Supplemental Figure 3: Genetic correlations between traits**

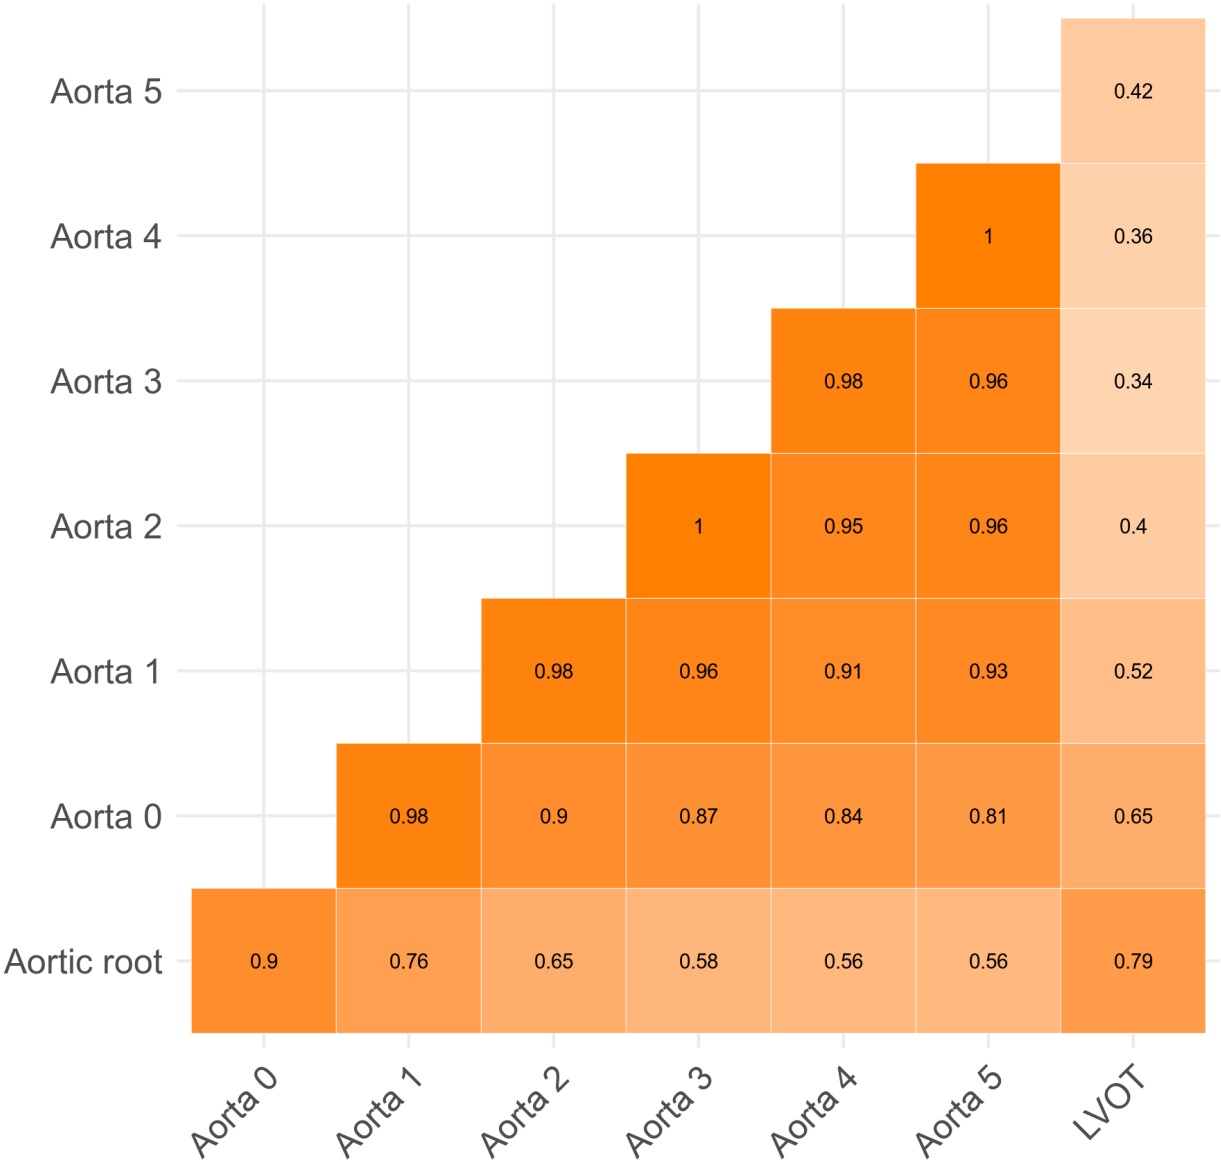

Supplement: Supplementary file [file media-1.pdf]
